# Supplementary material
Source: PubMed Central journal article supplement (PMC2865649)
Supplement: NIHMS198972-supplement-Data.pdf [file NIHMS198972-supplement-Data.pdf]

**Supplemental Table 1.**

Clinicopathologic characteristics of patients with lung adenocarcinomas from the three institutions\*

| <b>Characteristic</b>            | <b>BWH</b> | <b>UP</b> | <b>MGH</b> | <b>P value</b>    | <b>Total</b> |
|----------------------------------|------------|-----------|------------|-------------------|--------------|
| <b>Number of cases</b>           | 116        | 111       | 131        |                   | 358          |
| <b>Sex - n(%)</b>                |            |           |            | <b>0.5</b>        |              |
| Male                             | 43 (37)    | 48 (43)   | 47 (36)    |                   | 138 (39)     |
| Female                           | 73 (63)    | 63 (57)   | 84 (64)    |                   | 220 (61)     |
| <b>Age (years)</b>               |            |           |            | <b>0.002</b>      |              |
| Median                           | 67         | 70        | 63         |                   | 66           |
| Range                            | 34-87      | 41-88     | 29-90      |                   | 29-90        |
| <b>Smoking Status - n (%)</b>    |            |           |            | <b>&lt;0.0001</b> |              |
| Never smoker                     | 14 (12)    | 19 (17)   | 52 (40)    |                   | 85 (24)      |
| Smoker                           | 84 (72)    | 80 (72)   | 79 (60)    |                   | 243 (68)     |
| Unkown                           | 18 (16)    | 12 (11)   | 0 (0)      |                   | 30 (8)       |
| <b>Tumor Size (cm)**</b>         |            |           |            | <b>0.0003</b>     |              |
| Median                           | 2.3        | 2.2       | 3          |                   | 2.5          |
| Range                            | 0.6-12     | 0.6-7.5   | 0.3-11     |                   | 0.3-12       |
| <b>Tumor Status† - n (%)</b>     |            |           |            | <b>0.72</b>       |              |
| pT1                              | 41 (35)    | 45 (41)   | 21 (16)    |                   | 107 (30)     |
| pT2                              | 52 (45)    | 51 (46)   | 18 (14)    |                   | 121 (34)     |
| pT3                              | 6 (5)      | 3 (3)     | 1 (1)      |                   | 10 (3)       |
| pT4                              | 17 (15)    | 12 (11)   | 8 (6)      |                   | 37 (10)      |
| Unknown                          | 0 (0)      | 0 (0)     | 83 (63)    |                   | 83 (23)      |
| <b>Lymph Node Status† - n(%)</b> |            |           |            | <b>0.007</b>      |              |
| Negative                         | 68 (59)    | 82 (74)   | 30 (23)    |                   | 180 (50)     |
| Positive                         | 34 (29)    | 25 (23)   | 28 (21)    |                   | 87 (24)      |
| Unkown                           | 14 (12)    | 4 (4)     | 73 (56)    |                   | 91 (25)      |
| <b>Stage† - n (%)</b>            |            |           |            | <b>&lt;0.0001</b> |              |
| I                                | 63 (54)    | 78 (70)   | 28 (21)    |                   | 169 (47)     |
| II                               | 15 (13)    | 12 (11)   | 2 (2)      |                   | 29 (8)       |
| III                              | 29 (25)    | 21 (19)   | 17 (13)    |                   | 67 (19)      |
| IV                               | 9 (8)      | 0 (0)     | 84 (64)    |                   | 93 (26)      |

\*P value is based on the comparison between MGH patients and all other patients. Due to rounding not all percentages total 100

\*\*Based on 83 samples.

†Tumor and node status were based on pathology evaluation (pStage). Stage was based on both radiology and pathology evaluation (cStage).
